# Supplementary material
Source: MDPI journal article supplement (https://www.mdpi.com/2413-8851/5/3/54)
Supplement: s1 [file s1 › urbansci-1230639-SI.pdf]

Supplementary Files

Table S1 Ecosystem service equivalent value per unit area

| Ecosystem<br>classifica-<br>tion | Provision services      |                                      |                      | Regulation services |                            |                                |                                    |                        | Support services                      |                                  | Culture<br>services                      |
|----------------------------------|-------------------------|--------------------------------------|----------------------|---------------------|----------------------------|--------------------------------|------------------------------------|------------------------|---------------------------------------|----------------------------------|------------------------------------------|
|                                  | Food<br>produc-<br>tion | Raw ma-<br>terial<br>produc-<br>tion | Water<br>sup-<br>ply | Gas reg-<br>ulation | Climate<br>regula-<br>tion | Hydrolo-<br>gy regula-<br>tion | Environ-<br>ment puri-<br>fication | Soil conser-<br>vation | Nutrient<br>cycle<br>mainte-<br>nance | Biodiversity<br>mainte-<br>nance | Aesthetic<br>land-<br>scape<br>provision |
| Cultivated<br>land               | 2.21                    | 0.49                                 | -2.61                | 1.78                | 0.93                       | 2.99                           | 0.27                               | 1.04                   | 0.31                                  | 0.34                             | 0.15                                     |
| Forestry<br>area                 | 1.01                    | 2.32                                 | 1.2                  | 7.63                | 22.83                      | 14.94                          | 6.69                               | 9.29                   | 0.71                                  | 8.46                             | 3.71                                     |
| Grassland                        | 0.7                     | 1.03                                 | 0.57                 | 3.62                | 9.57                       | 7.01                           | 3.16                               | 4.41                   | 0.34                                  | 4.01                             | 1.77                                     |
| Water area                       | 1.31                    | 0.73                                 | 13.04                | 2.85                | 6.43                       | 133.6                          | 9.31                               | 3.24                   | 0.25                                  | 10.43                            | 6.71                                     |
| Unused<br>land                   | 0.01                    | 0.03                                 | 0.02                 | 0.13                | 0.1                        | 0.24                           | 0.41                               | 0.15                   | 0.01                                  | 0.14                             | 0.06                                     |

Table S2 Classification of ecosystem services

| Primary type        | Secondary type                | Definition of ecosystem services                                                                                                                                                      |
|---------------------|-------------------------------|---------------------------------------------------------------------------------------------------------------------------------------------------------------------------------------|
| Provision services  | Food production               | Converting solar energy into edible plant and animal products.                                                                                                                        |
|                     | Raw material production       | Converting solar energy into biological energy, used as buildings for human or other purposes.                                                                                        |
|                     | Water supply                  | Water resources provided by various ecosystems and used for residential life, agriculture (irrigation), industrial process, etc.                                                      |
| Regulation services | Gas regulation                | The ecosystem maintains the balance of the atmospheric chemical composition, absorbing SO <sub>2</sub> , fluoride, and nitrogen oxides.                                               |
|                     | Climate regulation            | Regional climate regulation, such as increasing precipitation and lowering temperatures.                                                                                              |
|                     | Hydrology regulation          | Ecosystems intercept, absorb and store precipitation, regulate runoff, regulate flood water, and reduce drought and flood disasters.                                                  |
|                     | Environment purification      | Vegetation and organisms remove and degrade excess nutrients and compounds, with the functions of retention of dust and decontamination, etc., including purifying the water and air. |
|                     | Soil conservation             | Accumulation of organic matter, the role of vegetation and organisms in soil conservation.                                                                                            |
| Support services    | Nutrient cycle maintenance    | The storage, internal circulation, processing and acquisition of N, P, and other elements and nutrients                                                                               |
|                     | Biodiversity maintenance      | The genetic origin and evolution of wildlife, habitats of wildlife, and plant.                                                                                                        |
| Culture services    | Aesthetic landscape provision | Landscapes with (potential) recreational use, cultural and artistic value.                                                                                                            |
